# Supplementary material for: Role of m6A modification and novel circ_0066715/ miR-486-5p/ ETS1 axis in rheumatoid arthritis macrophage polarization progression
Source: PubMed Central journal article supplement (PMC9831719; doi:10.18632/aging.204439), 2022-12-20
Supplement: aging-14-204439-s001.pdf [file aging-14-204439-s001.pdf]

SUPPLEMENTARY MATERIALS

Supplementary Figures

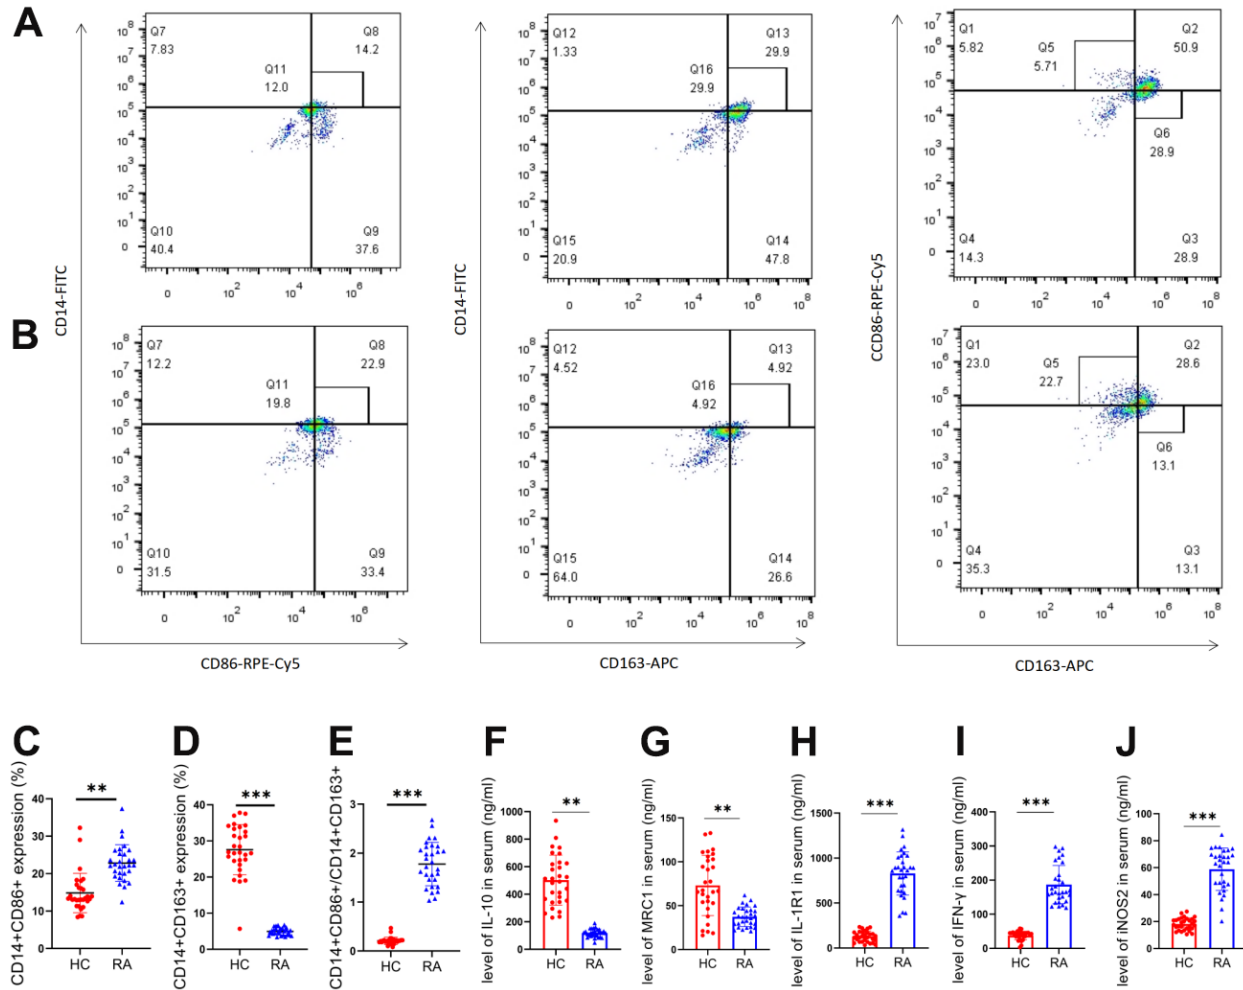

**Supplementary Figure 1. Comparison of M1 and M2 macrophage markers between the two groups. (A)** Flow cytometry of macrophages in the HC group. **(B)** Flow cytometry map of macrophages in RA group. **(C–F)** Comparison of HC and RA macrophage markers. **(G–J)** Comparison of cytokine secretion by HC and RA macrophages. \*\*\* $P < 0.001$ , \*\* $P < 0.01$ .

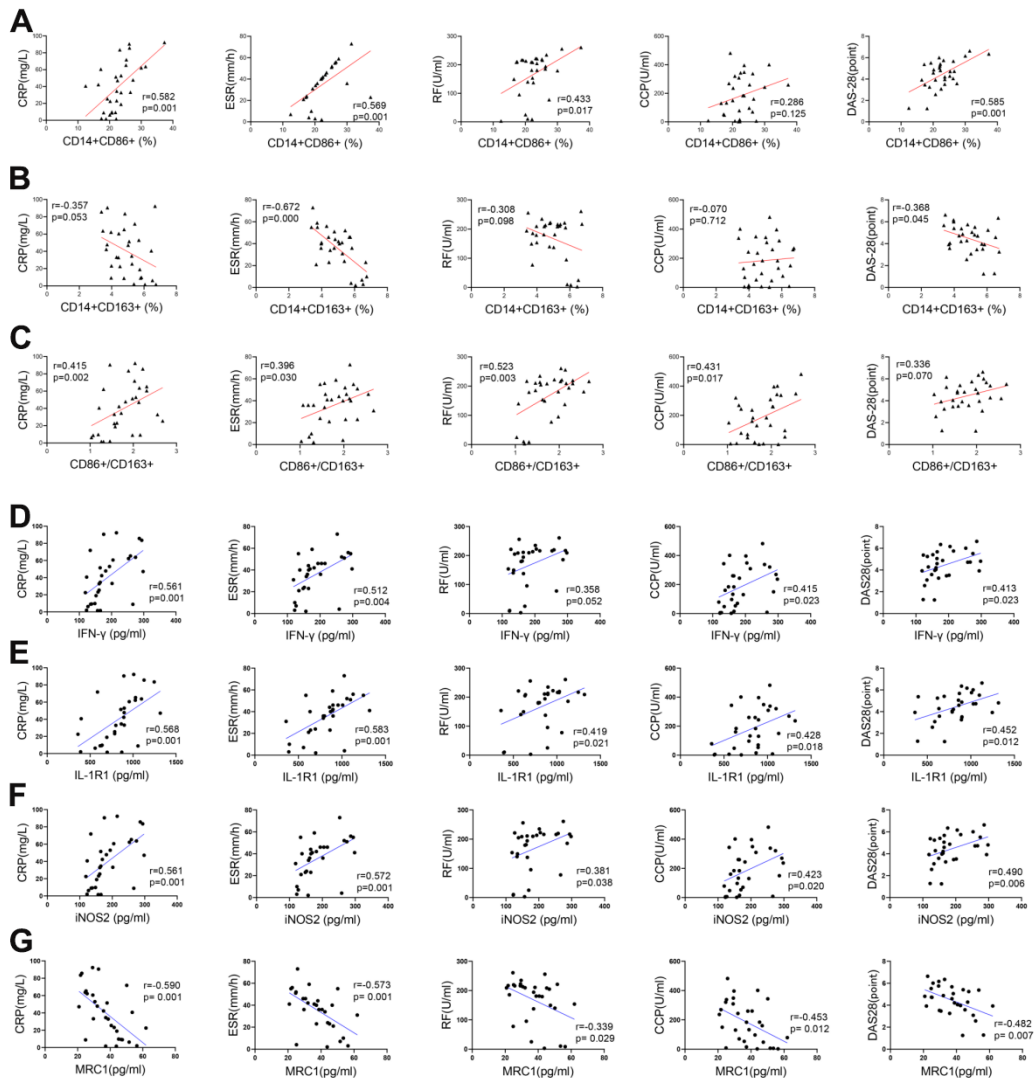

**Supplementary Figure 2. Correlation analysis between M1 and M2 macrophages and clinical indicators of RA.** (A) The correlation between CD14+CD86+ and clinical indicators of RA. (B) The correlation between CD14+CD163+ and clinical indicators of RA. (C) The correlation between CD86+/CD163+ and clinical indicators of RA. (D) The correlation between IFN- $\gamma$  and clinical indicators of RA. (E) Correlation of IL-1R1 with clinical indicators of RA. (F) Correlation of iNOS2 with clinical indicators of RA. (G) Correlation of MRC1 with clinical indicators of RA.

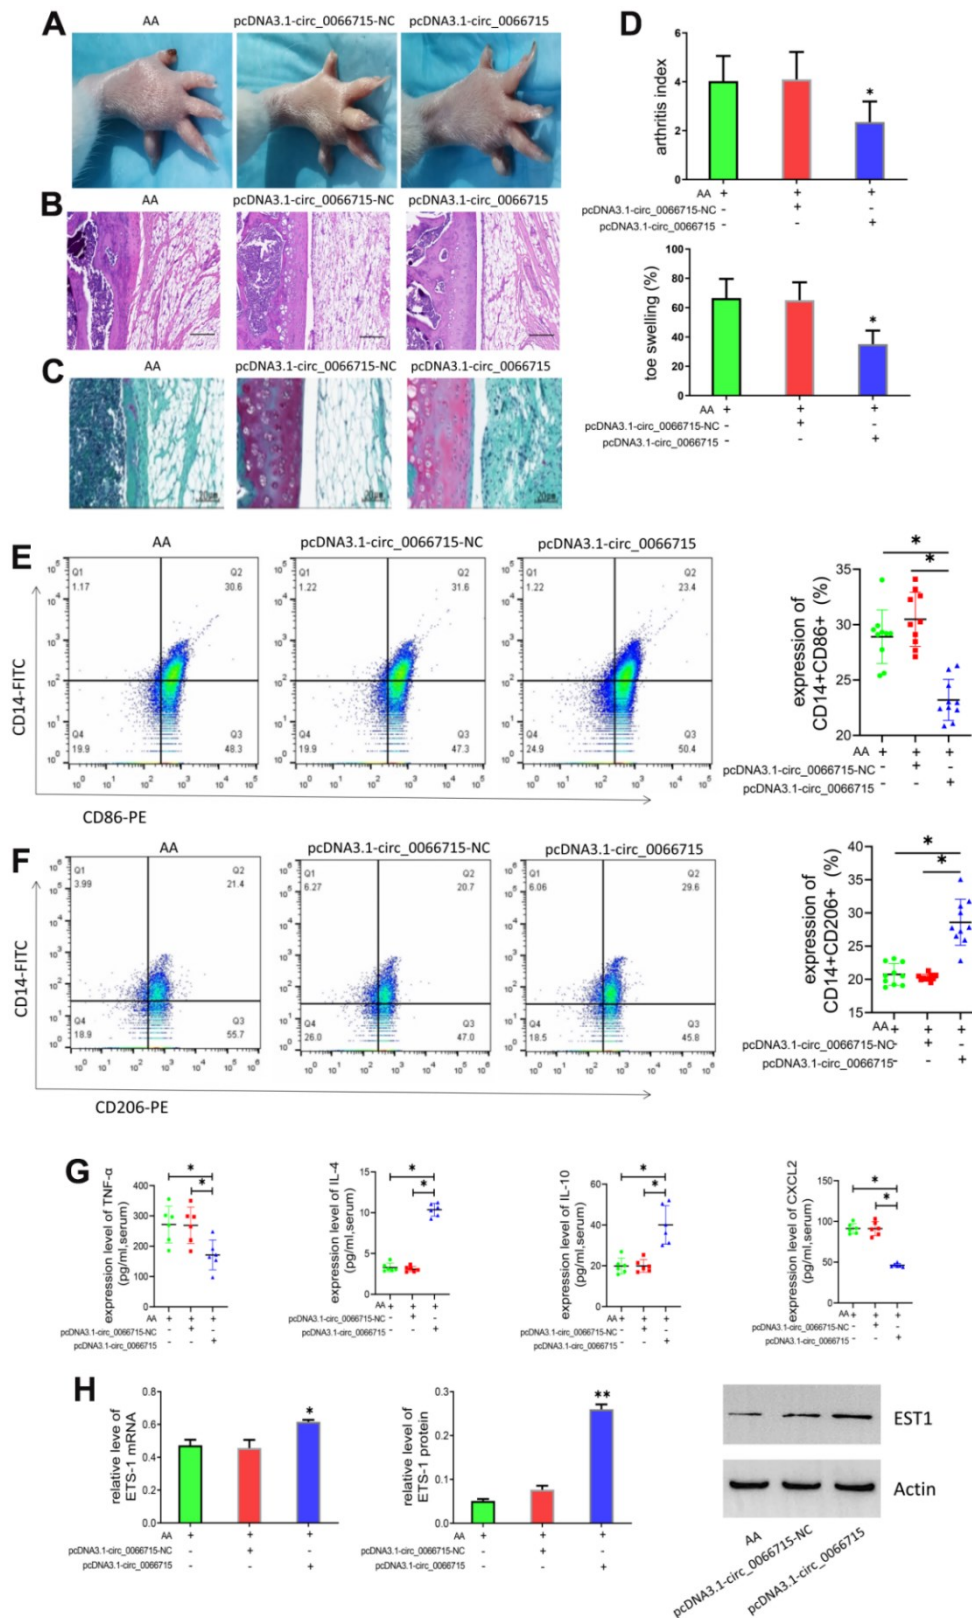

**Supplementary Figure 3. circ\_0066715 delays macrophage polarization *in vivo*.** (A) Comparison of joint morphology; (B) Comparison of joint HE staining ( $\times 200$ ); (C) Comparison of joint safranin fast green ( $\times 200$ ); (D) Comparison of arthritis index and toe swelling; (E) M1 macrophage marker comparison; (F) M2 macrophage marker comparison; (G) Comparison of cytokine secretion by macrophages; (H) ETS1 changes after circ\_0066715 overexpression. \*\*  $P < 0.01$ , \*  $P < 0.05$ .

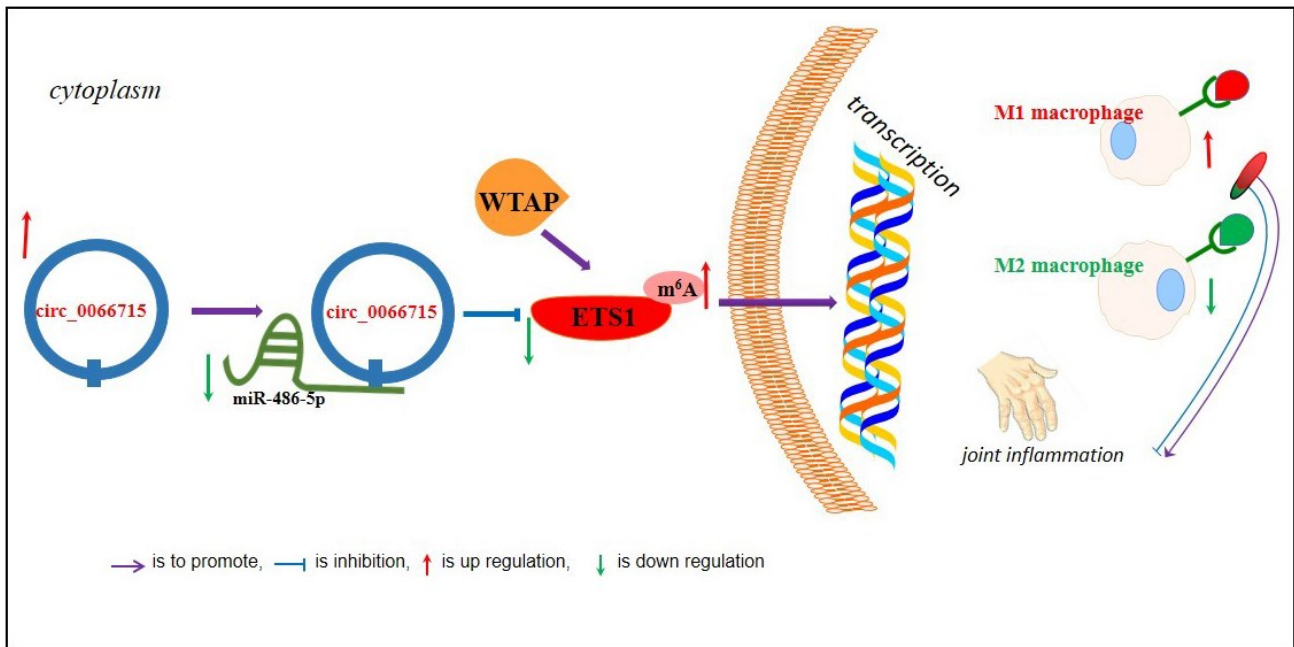

**Supplementary Figure 4. Mechanistic process of ceRNA regulatory axis and m6A methylation modification involved in RA macrophage polarization.**
